# Supplementary material
Source: MDPI journal article supplement (https://www.mdpi.com/2075-4655/4/1/4)
Supplement: s1 [file s1]

# Supplementary Materials

## Divergent DNA Methylation Signatures of Juvenile Seedlings Grafts and Adult Apple Trees

Authors: Adrien Perrin<sup>1</sup>, Nicolas Daccord<sup>1</sup>, David Roquis<sup>1,2</sup>, Jean-Marc Celton<sup>1</sup>, Emilie Vergne<sup>1</sup> and Etienne Bucher<sup>1,2</sup>

### Accession numbers:

GSE138492: global depository accession number comprising methylome and transcriptome data  
 GSE138377: bisulfite sequence data and methylation calling files + Supplemental table S3  
 GSE138491: microarray data

### Large datasets:

Supplemental table S3: DMRs list of OGvsSD and OGvsYG comparisons, including Gene- and TE-DMRs. File deposited on GEO: GSE138377

Supplemental table S4: DETs list of OGvsSD and OGvsYG comparison

Supplemental table S5: DTG- and DTTE-DMRs list of OGvsSD and OGvsYG comparisons

| (A)          |                        |       |           |                                              |                          |                      |
|--------------|------------------------|-------|-----------|----------------------------------------------|--------------------------|----------------------|
| Gene_ID      | Ratio<br>OGvsSD OGvsYG |       | TAIR name | Short description                            | Forward primer           | Reverse primer       |
| MD01G1090900 | 4.51                   |       | AT1G01060 | Homeodomain-like<br>superfamily<br>protein   | CAGAGTTTTTCACCGCCTTC     | CTCGTGCTGGTGACACACTT |
| MD02G1302200 | 3.17                   | 2.11  | AT3G63490 | Ribosomal protein<br>L1p/L10e family         | CAGAATTCAAGCAGGGGAAA     | CACCTGGTGGCTTATTGCT  |
| MD03G1128600 | 3.09                   | 1.91  | AT3G44890 | ribosomal protein<br>L9                      | GCTGCTCAAGGAAATGAAGG     | TCAACGAGATCTTGGGGTGT |
| MD12G1237700 | 3.01                   | 2.76  | ATCG01120 | chloroplast<br>ribosomal protein<br>S15      | GAAGAAAAAGACGAAAAACAGAGG | TGACTCCCGAATATCCAACC |
| MD16G1267700 |                        | 3.01  | AT5G14460 | Pseudo-uridine<br>synthase family<br>protein | CCTGCAAAGAAAAGCAAAGG     | CTCTTATCAGCCTCGCCATC |
| MD17G1271400 | 3.2                    |       | AT5G17300 | Homeodomain-like<br>superfamily<br>protein   | GAACAGCCAGTGATGACGAA     | TACTTTCCGGTGCTTGCTCT |
| MD02G1099300 | -1.75                  | -3.2  | AT5G20790 | Transmembrane<br>protein                     | CATTGAGTTTCGCTCACAA      | CCAGGTCAACGTCACTCTCA |
| MD09G1006500 | -3.81                  | -3.72 | AT3G02040 | Senescence-related<br>gene 3                 | CCGTCTCCAAGTGGTGT        | GCCTTTAACCTCCGACACAA |

### (B)

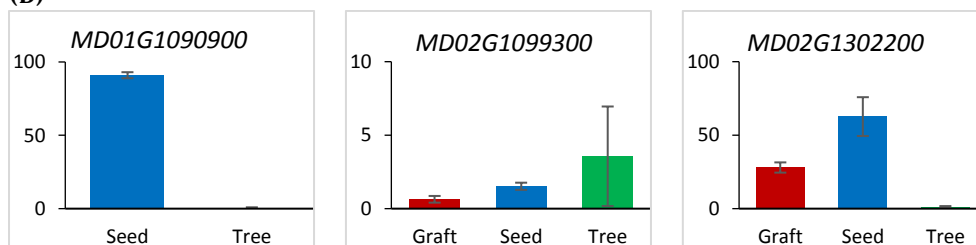

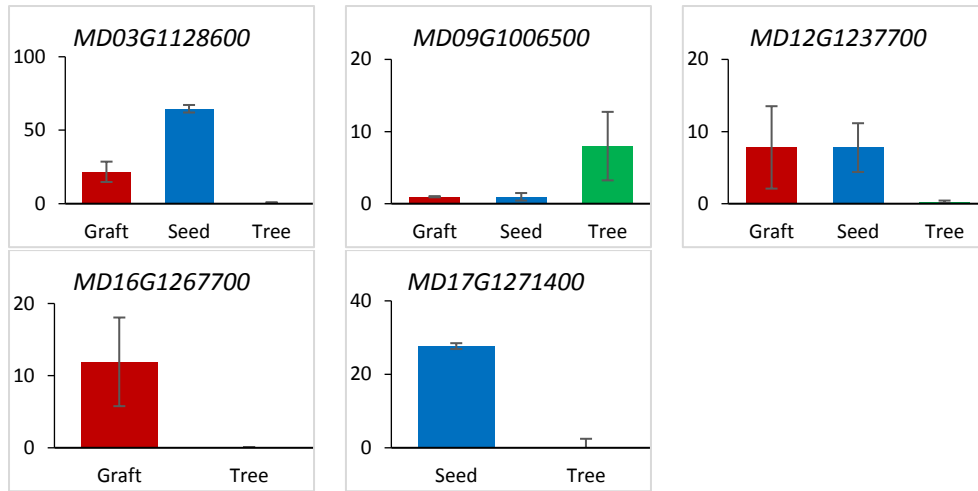

**Figure S1. Microarray validation.** (A) Q-PCR primers for micro array data validation. Indicated ratios came from micro array data in both comparisons. (B) Q-PCR validation of micro array data.

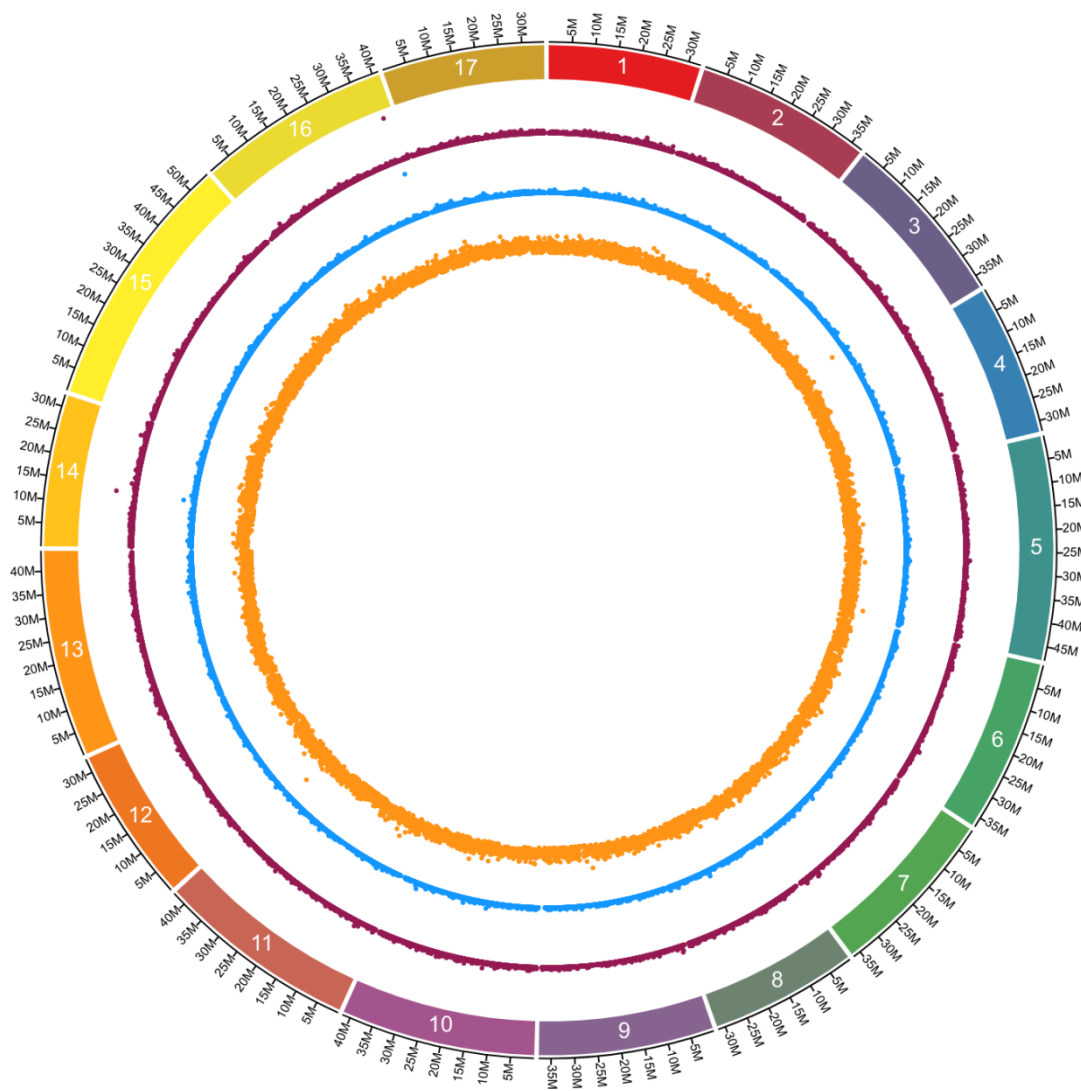

**Figure S2. Methylation overview in GDDH13.** Density plot of DMRs on all GDDH13 genome in OGvYG. In red, DMRs in CG context, in blue CHG and in orange CHH. Each point represent number of DMRs in 50kb windows of genome.

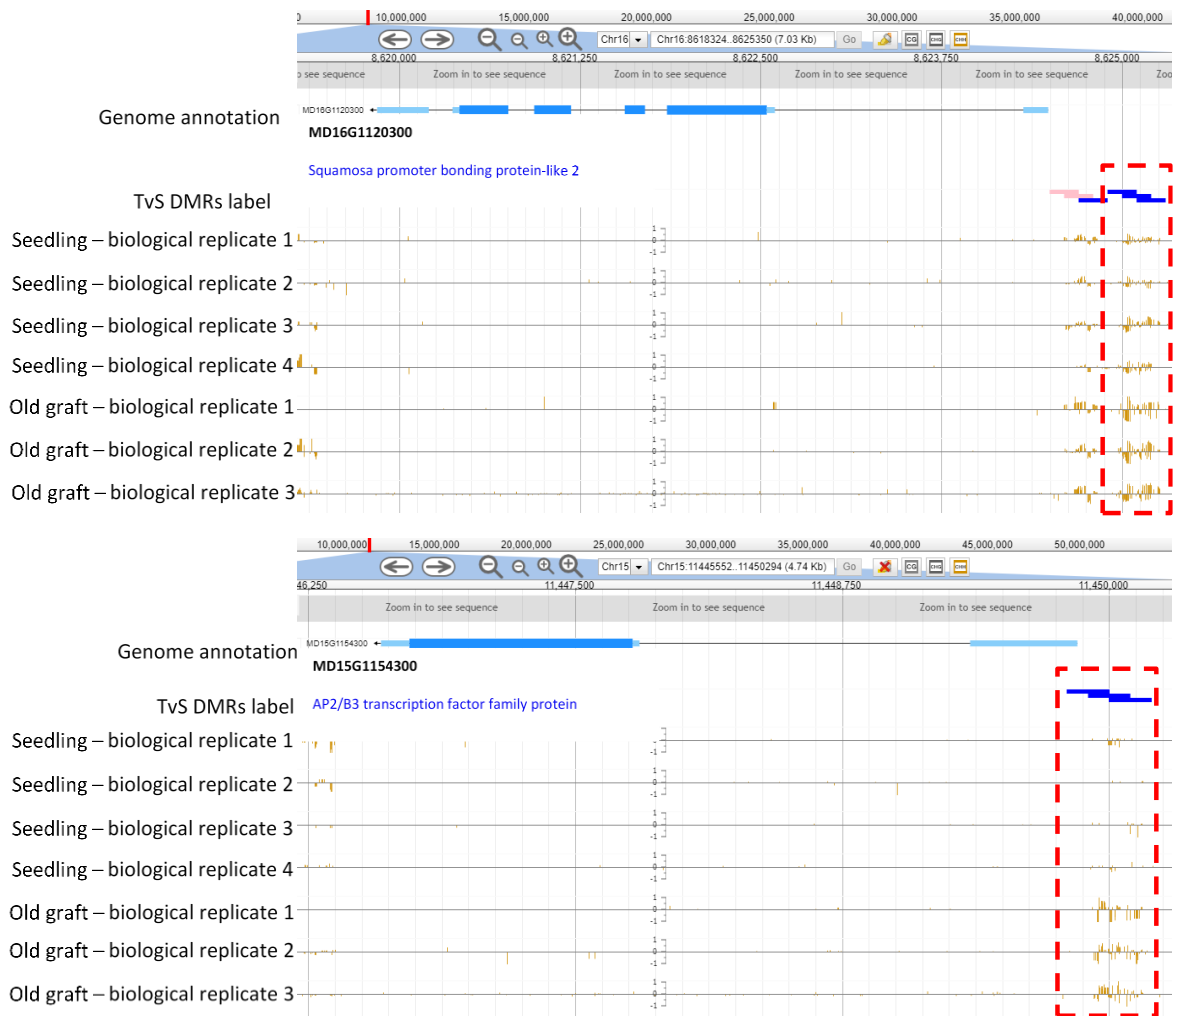

**Figure S3. Jbrowse screenshot** of two DTG-DMRs present in scatterplot (fig 7A) with DMRs in the promotor of genes highlight by a red dashed box.

**Table S1.** Resume of defined samples and details of sampling.

| Sample      | Way of multiplication | Years of obtention | Years sampling | Numbers sampled plants | Numbers leaves sampled per plant | Pooled | Number of biological replicates |
|-------------|-----------------------|--------------------|----------------|------------------------|----------------------------------|--------|---------------------------------|
| Old graft   | Grafting (Asexual)    | 2005               | 2016           | 1                      | 4                                | Yes    | 3                               |
| Seedling    | Seedling (Sexual)     | 2016               | 2016           | 4                      | 1                                | No     | 4                               |
| Young graft | Grafting (Asexual)    | 2016               | 2016           | 20                     | 1                                | Yes    | 2                               |

**Table S2.** Fixed threshold to filter DMRs calculated between each comparison. Threshold were empirically fixed by observation of methylation calling file in the Jbrowse software.

| DMRs    | Standard deviation average threshold |          |             | p-value |
|---------|--------------------------------------|----------|-------------|---------|
|         | Old graft                            | Seedling | Young graft |         |
| CG -CHG | <0.07                                | <0.11    | <0.07       | <1%     |
| CHH     | <0.05                                | <0.05    | <0.05       |         |

**Table S3.** DMRs list of OGvsSD and OGvsYG comparisons, including Gene- and TE-DMRs. File deposited on GEO with the following accession number GSE138377.**Table S4.** DETs list of OGvsSD and OGvsYG comparison. Excel file available in additional information (named: "Supp\_Tab\_S4").**Table S5.** DTG- and DTTE-DMRs list of OGvsSD and OGvsYG comparisons. Excel file available in additional information (named: "Supp\_Tab\_S5").**Table S6.** Functional classes found in enrichment analysis on Mapman software. In blue are indicated the number of DTGs up-regulated in SD or YG compare to OG, down-regulated ones are in red. "p-value" corresponds to the p-value obtained in the enrichment analysis and corrected by the BH method.

| Category name                                                                | Bincode | OGvsSD |    |          | OGvsYG |     |          | Commons |     |               |
|------------------------------------------------------------------------------|---------|--------|----|----------|--------|-----|----------|---------|-----|---------------|
|                                                                              |         | Down   | Up | p-value  | Down   | Up  | p-value  | Down    | Up  | other p-value |
| Coenzyme metabolism                                                          | 7       | 0      | 19 | 2.56E-05 |        |     |          | 1       | 3   | 1.59E-02      |
| Secondary metabolism/terpenoids                                              | 9.1     | 2      | 11 | 5.43E-03 |        |     |          |         |     |               |
| Secondary metabolism/phenolics/<br>p-coumaroyl-coa synthesis                 | 9.2.1   |        |    |          | 0      | 2   | 7.50E-03 |         |     |               |
| Chromatin organization                                                       | 12      | 19     | 3  | 2.48E-05 | 1      | 14  | 6.03E-03 |         |     |               |
| Cell cycle                                                                   | 13      |        |    |          | 5      | 39  | 9.05E-04 |         |     |               |
| Rna biosynthesis/transcriptional activation/SBP<br>transcription factor      | 15.7.18 | 8      | 0  | 3.37E-03 |        |     |          |         |     |               |
| Rna biosynthesis/organelle machineries                                       | 15.9    |        |    |          |        |     |          | 1       | 5   | 1.50E-02      |
| RNA processing                                                               | 16      |        |    |          | 5      | 30  | 3.53E-03 |         |     |               |
| Protein biosynthesis                                                         | 17      | 9      | 40 | 3.17E-03 | 5      | 29  | 2.90E-04 | 5       | 53  | 4.07E-12      |
| Protein modification/phosphorylation/<br>TKL kinase superfamily              | 18.8.1  |        |    |          |        |     |          | 1       | 9   | 1 6.55E-03    |
| Protein degradation/peptide tagging                                          | 19.4    | 18     | 15 | 7.94E-03 | 16     | 7   | 5.10E-04 |         |     |               |
| Protein degradation/peptidase<br>families/serine-type peptidase activities   | 19.5.2  |        |    |          |        |     |          | 1       | 9   | 1 8.33E-04    |
| Cytoskeleton                                                                 | 20      |        |    |          | 1      | 20  | 1.04E-06 |         |     |               |
| Cell wall                                                                    | 21      |        |    |          | 13     | 0   | 1.58E-05 |         |     |               |
| Protein translocation/chloroplast/thylakoid<br>membrane SRP insertion system | 23.1.7  |        |    |          |        |     |          | 1       | 7   | 1 1.50E-02    |
| Solute transport                                                             | 24      |        |    |          | 16     | 1   | 3.12E-06 |         |     |               |
| Enzyme classification                                                        | 50      | 30     | 84 | 4.24E-03 | 31     | 25  | 7.32E-03 |         |     |               |
| Not assigned                                                                 | 35      |        |    |          | 235    | 617 | 7.50E-03 | 122     | 252 | 14 1.17E-02   |

**Table S7. Count of DTG-DMRs in OGvsSD and OGvsYG comparisons.** Here we included the unclassified gene class “35” not present in Figure 6. Hypo- or hypermethylated in SD or YG compared to OG.

|          |              | OG vs SD       |                 |          | OG vs YG       |                 |          |
|----------|--------------|----------------|-----------------|----------|----------------|-----------------|----------|
| Context  | localization | Hypomethylated | Hypermethylated | $\Sigma$ | Hypomethylated | Hypermethylated | $\Sigma$ |
| CHH      | head         | 1394           | 55              | 1449     | 406            | 261             | 667      |
|          | body         | 295            | 21              | 316      | 137            | 70              | 207      |
|          | tail         | 684            | 31              | 715      | 228            | 137             | 365      |
| CHG      | head         | 0              | 2               | 2        | 0              | 3               | 3        |
|          | body         | 1              | 5               | 6        | 0              | 2               | 2        |
|          | tail         | 0              | 4               | 4        | 0              | 3               | 3        |
| CG       | head         | 1              | 5               | 6        | 0              | 7               | 7        |
|          | body         | 3              | 4               | 7        | 0              | 4               | 4        |
|          | tail         | 1              | 4               | 5        | 0              | 10              | 10       |
| $\Sigma$ |              | 2379           | 131             | 2510     | 771            | 497             | 1268     |

**Table S8. Count of DTTE-DMRs in CHH context in OGvsSD and OGvsYG comparisons.** Hypo- or hyper-methylated in SD or YG compared to OG.

|          |              | OG vs SD       |                 |          | OG vs YG       |                 |          |
|----------|--------------|----------------|-----------------|----------|----------------|-----------------|----------|
| Context  | localization | Hypomethylated | Hypermethylated | $\Sigma$ | Hypomethylated | Hypermethylated | $\Sigma$ |
| CHH      | head         | 0              | 0               | 0        | 0              | 0               | 0        |
|          | body         | 115            | 22              | 137      | 153            | 113             | 266      |
|          | tail         | 10             | 1               | 11       | 5              | 6               | 11       |
| CHG      | head         | 0              | 0               | 0        | 0              | 0               | 0        |
|          | body         | 0              | 3               | 3        | 1              | 28              | 29       |
|          | tail         | 0              | 0               | 0        | 1              | 0               | 1        |
| CG       | head         | 0              | 0               | 0        | 0              | 0               | 0        |
|          | body         | 1              | 6               | 7        | 1              | 22              | 23       |
|          | Tail         | 0              | 0               | 0        | 0              | 1               | 1        |
| $\Sigma$ |              | 126            | 32              | 158      | 161            | 170             | 331      |
